# Supplementary material
Source: PubMed Central journal article supplement (PMC5380563)
Supplement: NIHMS851902-supplement-1.pdf [file NIHMS851902-supplement-1.pdf]

A

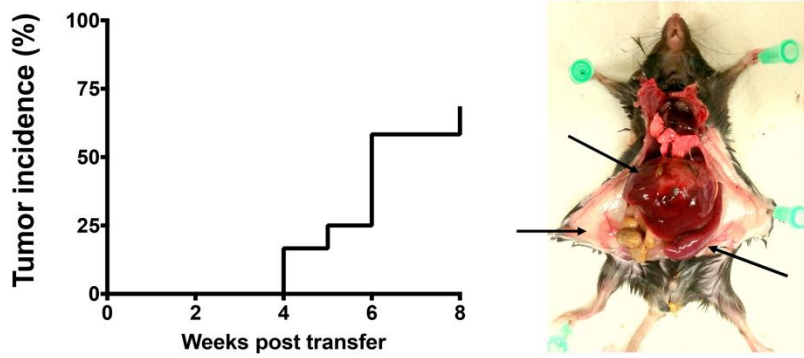

B

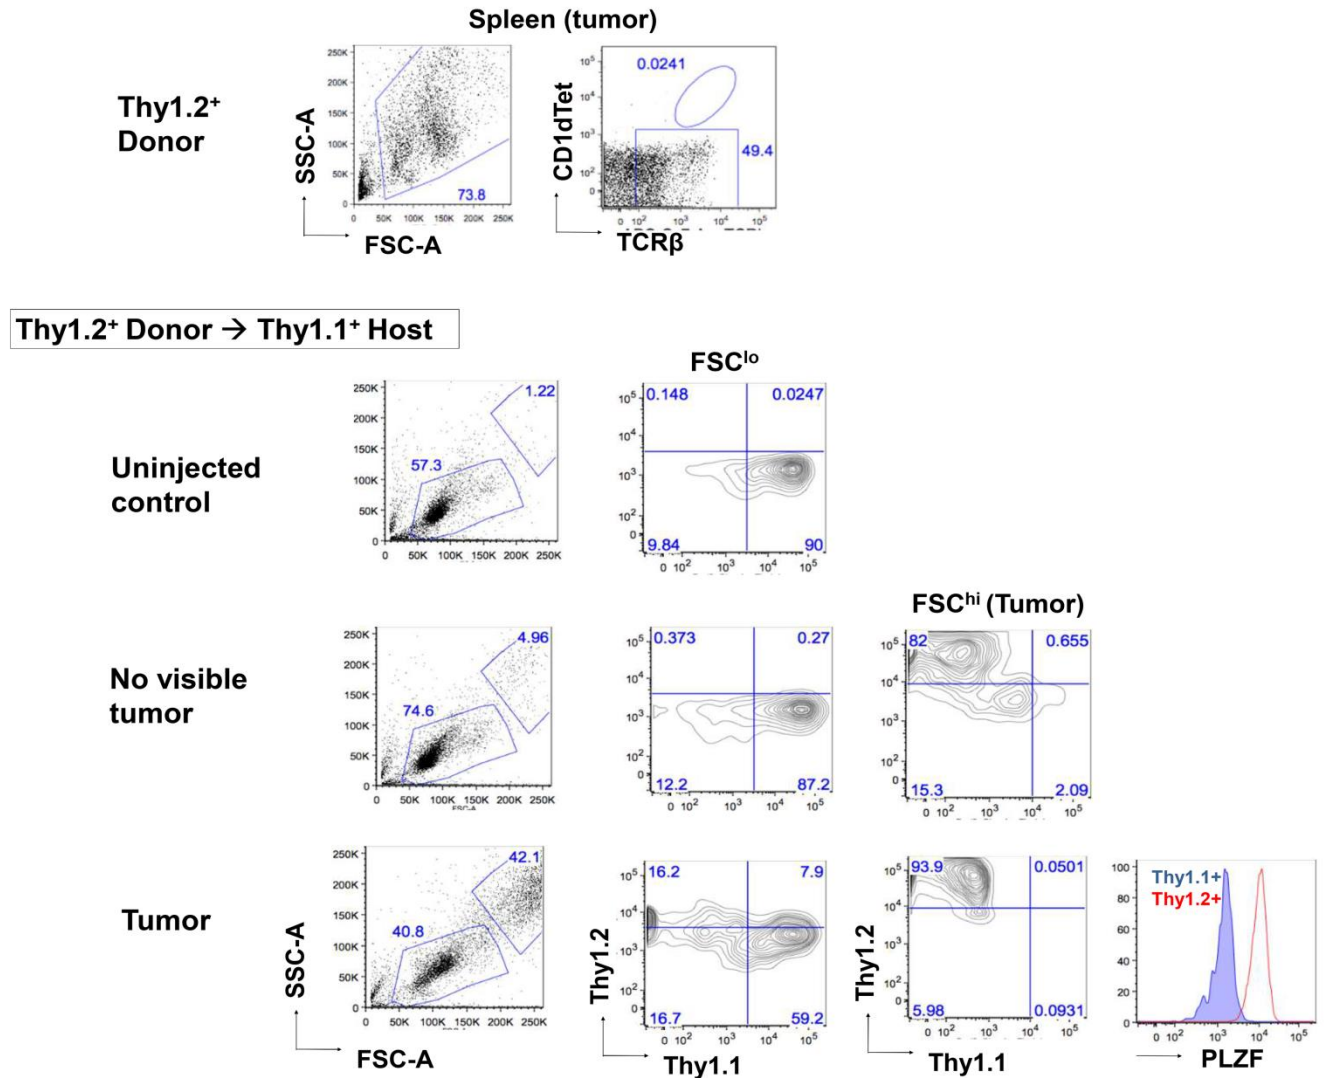

### Supplementary Figure 1: Adoptive transfer of lymphoma cells gives rise to tumors in WT hosts

(A) Tumor incidence (left) in WT hosts (N = 10) after receiving  $5 \times 10^6$  lymphoma cells from L-DKO donor mice with CD1dTet<sup>-</sup> tumor (N = 2). Representative picture of host with tumor in liver, spleen and LN (marked with arrows). (B) Representative flow cytometry analysis of CD1dTet<sup>-</sup> lymphoma donor cells from spleen (top panel), and cells recovered from spleen of Thy1.1<sup>+</sup> WT hosts, 10 weeks after receiving Thy1.2<sup>+</sup> lymphoma donor cells, or uninjected control. Retention of the innate-like phenotype of lymphoma donor cells was verified by upregulated PLZF expression in FSC<sup>hi</sup> TCRβ<sup>+</sup>Thy1.2<sup>+</sup> cells (large lymphoma cells) as compared to FSC<sup>lo</sup>TCRβ<sup>+</sup>Thy1.1<sup>+</sup> cells.

**A**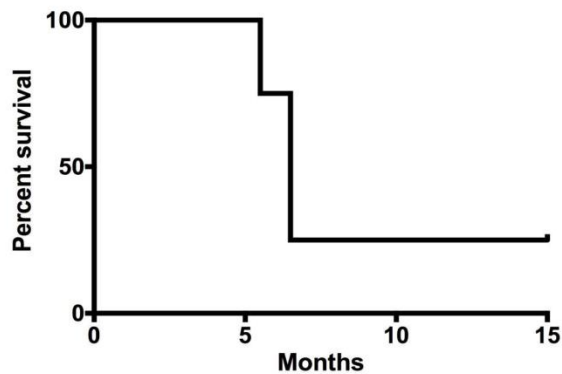

| Mouse ID | Age (Weeks) | Involvement |
|----------|-------------|-------------|
| CV2      | 26          | T S L G     |
| CV55     | 22          | T           |
| CV       | 22          | LN          |

**B**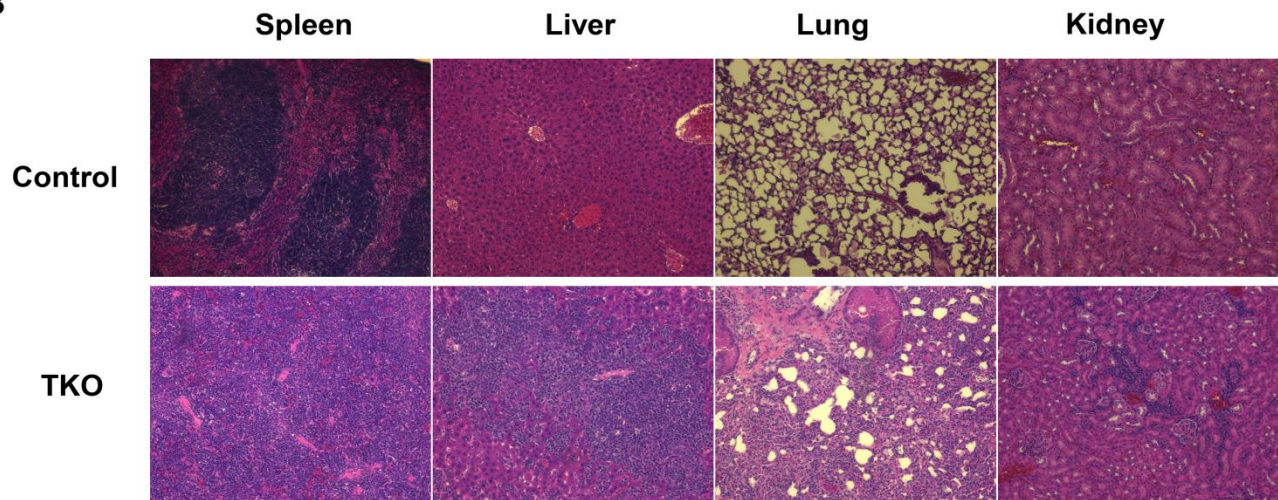**C**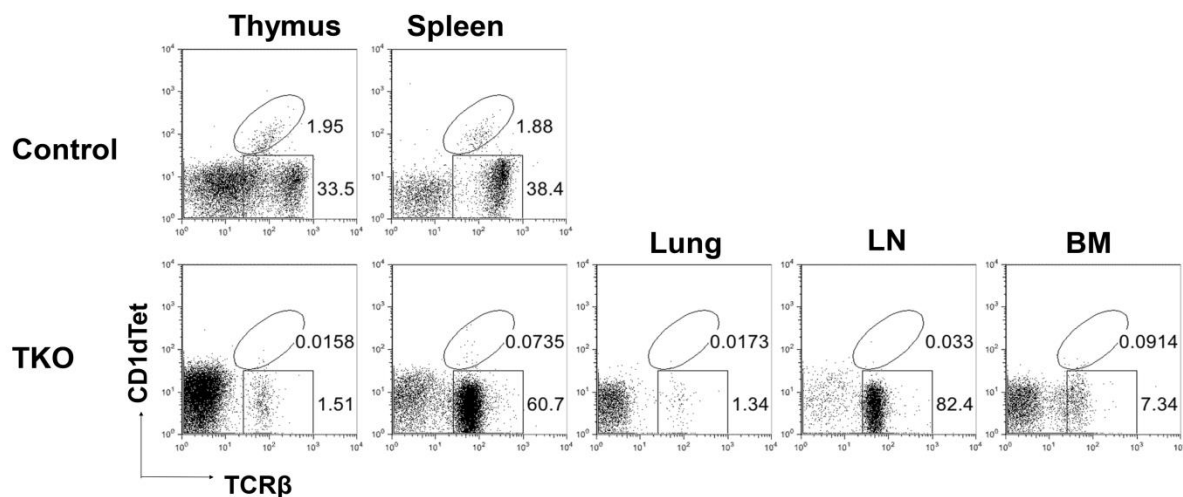

### Supplementary Figure 2: CD1d-independent CD1dTet-TCR $\beta$ <sup>+</sup> T cells give rise to lymphomas in TKO mice

(A) Survival curve for TKO mice (N=4) along with details of mice that developed tumor. (B) Representative pictures of H&E staining of spleen, lung, liver and kidney tissue sections from Cre<sup>-</sup> control and TKO mice (100X). (C) Representative distribution of TCR $\beta$ <sup>+</sup>CD1dTet<sup>+</sup> and TCR $\beta$ <sup>+</sup>CD1dTet<sup>-</sup> cells in thymus, spleen, lung, lymph node (LN) and bone marrow (BM) of Cre<sup>-</sup> mice and TKO mice with tumors.

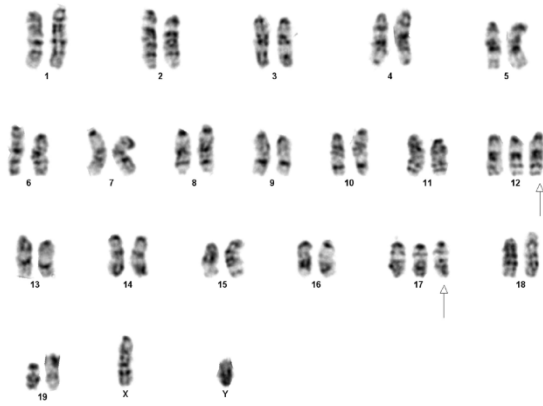

Slide10-PP cells 2/26-3 Cell: 32

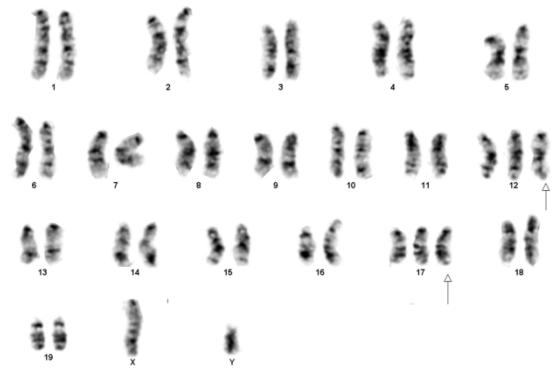

Slide: 3\_PP cells Cell: 8

### Mouse 57 : Cd1dTet<sup>+</sup> tumor (Abnormal karyotype)

**42,XY,+12,+17[8]/43,XY,+Y,+12,+17[4]/41,X,-Y,+12,+17[4]/40,XY[27]**

#### Tissues

|                                     |          |                          |
|-------------------------------------|----------|--------------------------|
| <b>Lymph Node (LN) (10 cells)</b>   | Normal   | 4 cells                  |
|                                     | Abnormal | 42,XY,+12,+17_2 cell     |
|                                     |          | 43,XY,+Y,+12,+17_3 cells |
| <b>Spleen (SP) (11 cells)</b>       | Normal   | 7 cells                  |
|                                     | Abnormal | 42,XY,+12,+17_2 cells    |
|                                     |          | 41,X,-Y,+12,+17_2 cells  |
| <b>Peyer's patch (PP)(23 cells)</b> | Normal   | 16 cells                 |
|                                     | Abnormal | 42,XY,+12,+17_4 cell     |
|                                     |          | 43,XY,+Y,+12,+17_1 cell  |
|                                     |          | 41,X,-Y,+12,+17_2 cell   |

### Mouse 75 : CD1dTet<sup>-</sup> tumor (Normal karyotype)

**40,XY[20]**

|                           |        |          |
|---------------------------|--------|----------|
| <b>Lymph Node (LN)</b>    | Normal | 4 cells  |
| <b>Peyer's patch (PP)</b> | Normal | 6 cells  |
| <b>Thymus</b>             | Normal | 10 cells |

### Supplementary Figure 3: Karyotyping analysis of lymphoma samples

Karyotyping analysis of lymphoma samples from one mouse with CD1dTet<sup>+</sup> tumor and one with CD1dTet<sup>-</sup> tumor. Karyotypes for individual tissue samples are described.

**Supplementary Table I: Cluster definitions according to Self-Organizing Map (SOM) analysis<sup>1</sup>**

| Cluster ID | Row | Column | Gene Names                                                                              |
|------------|-----|--------|-----------------------------------------------------------------------------------------|
| 1          | 1   | 1      | Ifit1, Sh3bgrl2, Secisbp2l, Ifih1, Cmpk2, Irgm2, Irf7                                   |
| 2          | 1   | 2      | Scn11a, Rps4y2, Hivep3, Ddx24, AY036118, Tprgl                                          |
| 3          | 1   | 3      | F2rl1, Btg2, Coro2a, Atg14, Chd7, Rasa1, Osbp15                                         |
| 4          | 1   | 4      | Arl4d, Itgae, Trip4, Pcgf2, Rgs3                                                        |
| 5          | 1   | 5      | Marveld2, Ahnak, Smpdl3a, Fgd6                                                          |
| 6          | 2   | 1      | Phxr4, Brdt, Arl4c, Ndr3, Dgka, Ifi2712a, Vangl2                                        |
| 7          | 2   | 2      | Parg, H2-T24, Cox6b2, Ccs, Hmbox1, Ldlrap1, Emilin1, Fam189b, Ndr3                      |
| 9          | 2   | 4      | Cxcr3, Rhob, Cd244                                                                      |
| 10         | 2   | 5      | Adam19, Hip1, Cttd                                                                      |
| 11         | 3   | 1      | Ccr7, Igfbp4, Rag2                                                                      |
| 13         | 3   | 3      | Tmem176a, Tnc, Pld4, Lgals1, Wbp5, Colec12, Ggta1, Cdh5, Vcam1, Mmp2, Rab34, Sdc1, Rhoj |
| 14         | 3   | 4      | Pygl, Cst7, Slc39a4, Ifngr1, Syng2                                                      |
| 15         | 3   | 5      | Ifitm3, Ms4a6c, Ccl5, Swap70, Il10ra, Ccr5, Naip2                                       |
| 16         | 4   | 1      | Figl1, Cdk1, Emp3                                                                       |
| 17         | 4   | 2      | Tbc1d24, Sepp1, Fhl1                                                                    |
| 18         | 4   | 3      | Cpe, Adm, Cfp, Slc15a3, Cd83, Cd86, Ms4a1, Cd79b, Fabp5, Ccl11                          |
| 19         | 4   | 4      | Frmd4b, Grn, Mt2, Ctsz, Hgfac                                                           |
| 20         | 4   | 5      | Icosl, Naip5, Irf5, Txndc5                                                              |
| 21         | 5   | 1      | Prss23, Cd81, Pdzd3, Slc27a2                                                            |
| 22         | 5   | 2      | Myh3, Fscn1, Mertk, Cd74, Lepr, Lpcat1, H2-DMA                                          |
| 23         | 5   | 3      | Ms4a7, Spon1, Papss2, Bgn, Ccdc88a, Relb, Gns, Procr, Mospd2, Ankrd33b, Nfkbie, Pawr    |
| 24         | 5   | 4      | Csf2rb, Lpl, 2610528A11Rik, Ryr1, Cebpdl, Ly6d, Myadm, Ncf1, Serpina10, Cp, Slc4a8      |
| 25         | 5   | 5      | Chi3l3, Mrc1, Gja1, Rsph1, Pkd2, Lrrk1, Steap4, Emp1, Rgs18, Uap1, Ccr1, Prcp           |

<sup>1</sup>List of genes in each cluster (identified by row and column number in map) as defined by the Self-Organizing Map (SOM) analysis shown in Figure 7B.
